# Supplementary material for: Pheochromocytoma as a frequent false-positive in adrenal washout CT: A systematic review and meta-analysis
Source: Springer Nature journal article supplement (doi:10.1007/s00330-017-5076-5), 2017-10-12
Supplement: MOESM1 [file 15129302]

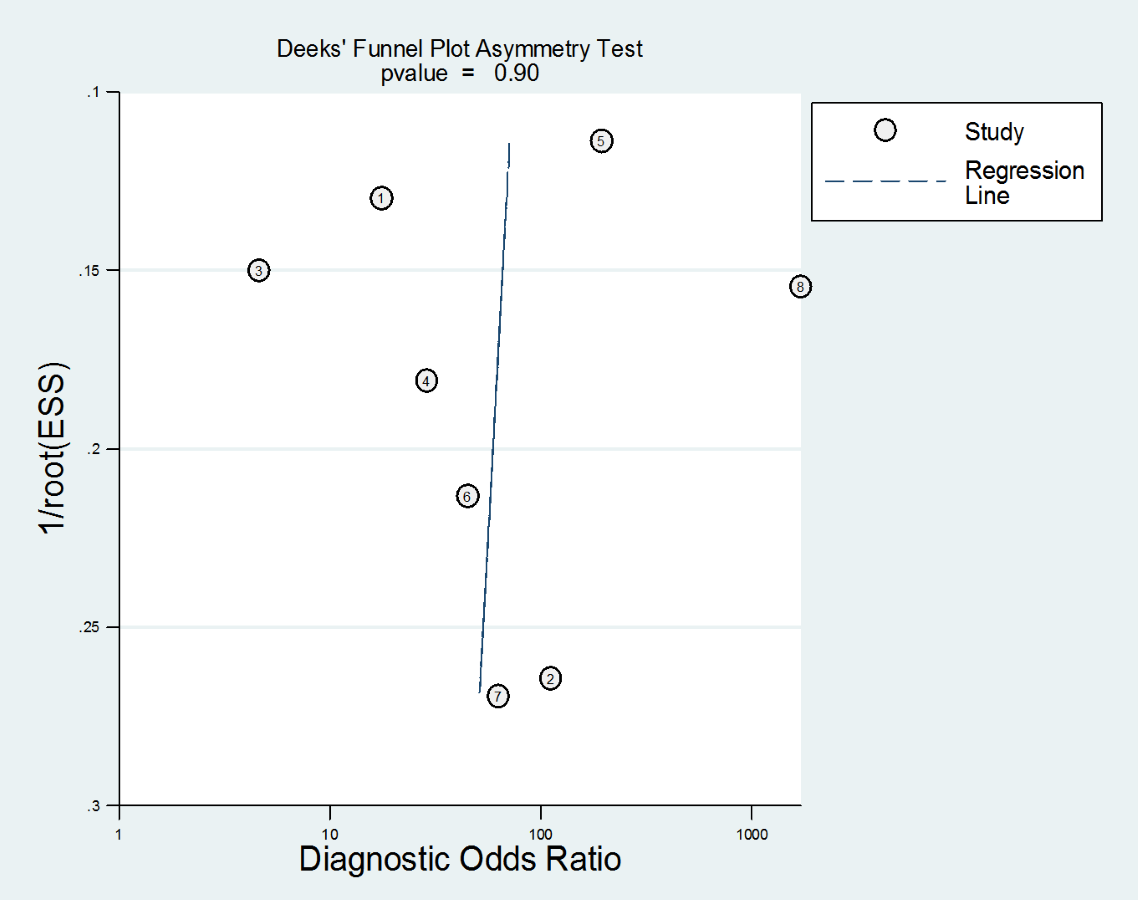


**Supplementary Fig. 1.** Deeks’ funnel plot for eight studies assessing diagnostic performance of adrenal washout CT. P-value of 0.90 suggests that the likelihood of publication bias is low.
